# Supplementary material
Source: Research Square preprint supplement (doi:10.21203/rs.3.rs-9480499/v1)
Supplement: Supplementary file 1 [file 3dcb8c73db09144fd2e21ea8.doc]

Figure S1.. Construction of 1300-ssIIIa.

1. Amplify the ssIIIa promoter from rice genomic DNA using a pair of primers: ssIIIa-PMT-PmeF and ssIIIa-PMT-NcoR, clone the ssIIIa promoter into the pUCmT vector. Sequencing the promoter using M13-F, M13R-F, and ssIIIa-PMT-S1. Select the clones that both of NcoI sites located at the same side.

2. Amplify the ssIIIa CDS from rice total cDNA using a pair of primers: ssIIIa-NcoF and ssIIIa-KpnR, clone the ssIIIa promoter into the pUCmT vector. Sequencing the promoter using M13-F, M13R-F, ssIIIa-CDS-S1, ssIIIa-CDS-S2, ssIIIa-CDS-S3, ssIIIa-CDS-S4, ssIIIa-CDS-S5, ssIIIa-CDS-S6.

3. Digest the pUCmT-ssIIIa promoter with NcoI/ClaI and use the fragment of 4.9kb as the recipient. Digest the pUCmT-ssIIIa CDS with NcoI/ClaI and use the fragment of 1.7kb as the donor. Construct the T-ssIIIa-PMT-CDS1.

4. Digest the T-ssIIIa-PMT-CDS1 with ClaI/KpnI and use the fragment of 6.5kb as the recipient. Digest the pUCmT-ssIIIa CDS with ClaI/KpnI and use the fragment of 3.7kb as the donor. Construct the T-ssIIIa-PMT-CDS.

5. Digest the pCAMBIA1300 with PmeI/KpnI and use the fragment of 9kb as the recipient. Digest the pUCmT-ssIIIa-PMT-CDS with PmeI/KpnI and use the fragment of 7.5kb as the donor. Construct the 1300-ssIIIa.

Figure S1. Construction of 1300-ssIIIa.
